# Supplementary material for: Palynological evidence reveals an arid early Holocene for the northeast Tibetan Plateau
Source: Copernicus journal article supplement (doi:10.5194/cp-18-2381-2022), 2022-10-25
Supplement: Supplementary file 1 [file cp-18-2381-2022-supplement.zip]

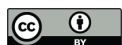

*Supplement of*

**Palynological evidence reveals an arid early Holocene for the northeast Tibetan Plateau**

**Nannan Wang et al.**

*Correspondence to:* Xianyong Cao ([xcao@itpcas.ac.cn](mailto:xcao@itpcas.ac.cn))

- [cp-18-2381-2022-supplement-title-page.pdf](#)
- [Fig.S1-Reconstruction of Pann and Mtna.pdf](#)
- [Supplement-Quantitative climatic reconstruction of Gahai Lake-revised-version.doc](#)
- [Supplement-Quantitative climatic reconstruction of Gahai Lake-revised-version.pdf](#)

The copyright of individual parts of the supplement might differ from the article licence.
