# Supplementary material for: Palynological evidence reveals an arid early Holocene for the northeast Tibetan Plateau
Source: Copernicus journal article supplement (doi:10.5194/cp-18-2381-2022), 2022-10-25
Supplement: Supplementary file 2 [file cp-18-2381-2022-supplement.zip]

Archive with 4 entries (4 files):
- Supplement-Quantitative climatic reconstruction of Gahai Lake-revised-version.pdf
- cp-18-2381-2022-supplement-title-page.pdf
- Fig.S1-Reconstruction of Pann and Mtwa.pdf
- Supplement-Quantitative climatic reconstruction of Gahai Lake-revised-version.doc
