# Supplementary figures and images for: Palynological evidence reveals an arid early Holocene for the northeast Tibetan Plateau
Source: Copernicus journal article supplement (doi:10.5194/cp-18-2381-2022), 2022-10-25

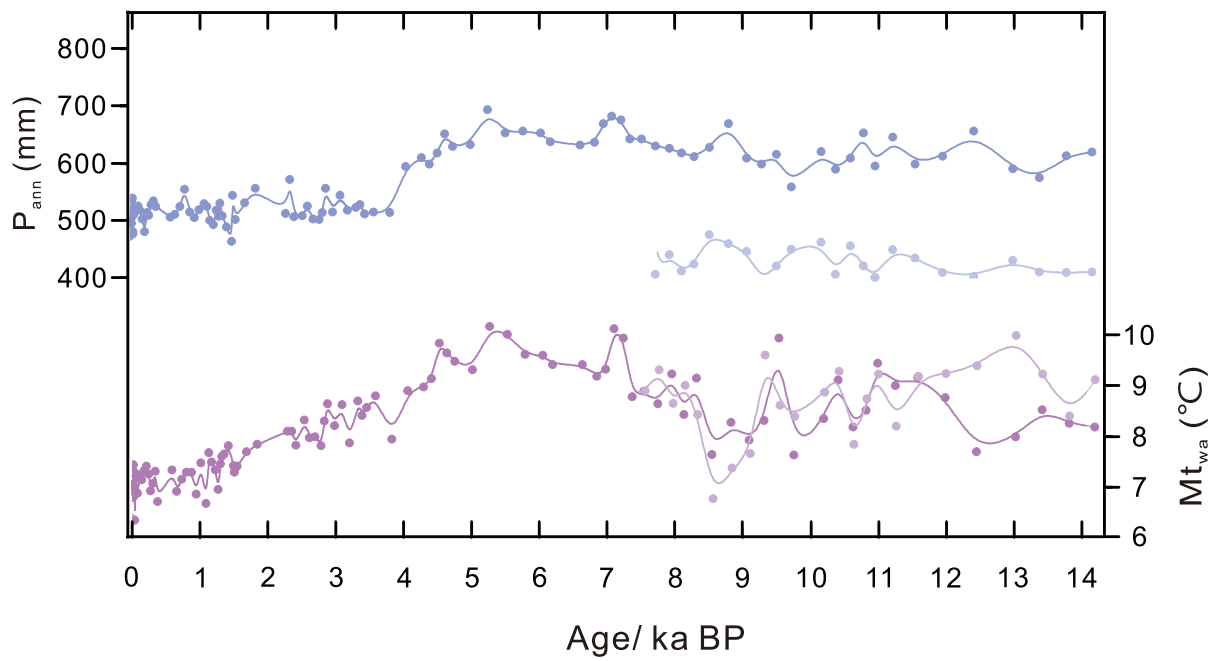

Supplement: Supplementary file 2 [file cp-18-2381-2022-supplement.zip › Fig.S1-Reconstruction of Pann and Mtwa.pdf]
